# Supplementary material for: Detection of Cyanotoxins in Algae Dietary Supplements
Source: PubMed Central journal article supplement (PMC5371831; doi:10.3390/toxins9030076), 2017-02-25
Supplement: toxins-09-00076-s001.pdf [file toxins-09-00076-s001.pdf]

# Supplementary Materials: Detection of Cyanotoxins in Algae Dietary Supplements

Audrey Roy-Lachapelle, Morgan Sollicec, Maryse F. Bouchard, and Sébastien Sauvé

## SI1. Chemicals, reagents and stock solutions

2-methyl-3-methoxy-4-phenylbutyric acid sodium salt (MMPB, purity  $\geq 94\%$ ) was purchased from Wako Pure Chemical Industries, Ltd. (Osaka, Japan). 4-phenylbutyric acid (4-PB, purity  $\geq 99\%$ ), L-BMAA hydrochloride (BMAA, purity  $\geq 97\%$ ), DL-phenylalanine (PHE, purity  $\geq 99\%$ ) and nodularin (NOD,  $\geq 99\%$ ) were obtained from Sigma-Aldrich (Oakville, ON, Canada). All selected standards for microcystins (MCs-RR, -YR, -LR, -LY, -LW, -LF and -LA, purity  $\geq 99\%$ ), anatoxin-a (ANA-a, purity  $\geq 99\%$ ) and cylindrospermopsin (CYN, purity  $\geq 99\%$ ) were purchased from Abcam Biochemicals (Cambridge, MA, USA). 2,4 diaminobutyric acid-2,4,4-D<sub>3</sub> dihydrochloride (DAB-D<sub>3</sub>, 99 atom % D) and DL-phenylalanine ring-D<sub>5</sub> (PHE-D<sub>5</sub>, purity  $\geq 98\%$ ) were purchased from CDN isotopes (Pointe-Claire, QC, Canada). Ampoule of certified standard solutions of saxitoxin dihydrochloride (STX, 66.3  $\mu\text{M}$  in 3 mM hydrochloric acid) was obtained from the Certified Reference Materials Program (NRC, Halifax, NS, Canada). Potassium permanganate (KMnO<sub>4</sub>, purity  $\geq 99,0\%$ ), sodium (meta)periodate (NaIO<sub>4</sub>, purity  $\geq 99,0\%$ ), sodium bisulfate (purity  $\geq 95\%$ ), sodium hydroxide (NaOH, purity  $\geq 98\%$ ), sodium tetraborate (Borax, purity  $\geq 99\%$ ), dansyl chloride (DNS, purity  $\geq 99\%$ ), citric acid (purity  $\geq 99.5\%$ ), and formic acid (HCOOH, purity  $\geq 95.0\%$ ), hydrochloric acid (HCl, ACS reagent 37%) and sulfuric acid standard solution (1.000 M) were obtained from Sigma-Aldrich (Oakville, ON, Canada). All solvents used were of high performance liquid chromatography (HPLC) grade purity from Fisher Scientific (Whitby, ON, Canada). Deionized/distilled water (dd-H<sub>2</sub>O) was used recovery evaluation. Compressed air (Ultra Zero Certified grade;  $\leq 2$  ppm water) used as carrier gas for the LDTD desorption was purchased from MEGS Specialty Gases, Inc. (St-Laurent, QC, Canada).

**Table S1.** Recoveries from matrix effects of targeted cyanotoxins evaluated at two different concentrations levels ( $\mu\text{g g}^{-1}$ ) with standard deviation (STD,  $n = 3$ ).

| Compounds <sup>a</sup> | Signal Recovery from Matrix Effect $\pm$ STD (%) |              |             |
|------------------------|--------------------------------------------------|--------------|-------------|
|                        | Low                                              | High         |             |
| 1                      | MMPB <sup>b,c</sup>                              | 85 $\pm$ 11  | 87 $\pm$ 8  |
|                        | ANA-a <sup>b</sup>                               | 90 $\pm$ 10  | 92 $\pm$ 9  |
| 2                      | ANA-a                                            | 93 $\pm$ 5   | 95 $\pm$ 6  |
|                        | MC-RR                                            | 91 $\pm$ 7   | 94 $\pm$ 5  |
|                        | MC-YR                                            | 94 $\pm$ 4   | 92 $\pm$ 5  |
|                        | MC-LR                                            | 98 $\pm$ 5   | 102 $\pm$ 7 |
|                        | MC-LA                                            | 109 $\pm$ 8  | 105 $\pm$ 6 |
|                        | MC-LY                                            | 95 $\pm$ 3   | 91 $\pm$ 6  |
|                        | MC-LW                                            | 103 $\pm$ 6  | 108 $\pm$ 8 |
|                        | MC-LF                                            | 112 $\pm$ 9  | 104 $\pm$ 8 |
| 3                      | CYN                                              | 108 $\pm$ 10 | 102 $\pm$ 7 |
|                        | STX                                              | 94 $\pm$ 8   | 98 $\pm$ 9  |
|                        | BMAA                                             | 105 $\pm$ 4  | 109 $\pm$ 6 |

<sup>a</sup> Validation results are divided between the three methods. Low concentration and High concentrations are respectively set as the follow: 1 and 10  $\mu\text{g g}^{-1}$  (1), 0.1 and 10  $\mu\text{g g}^{-1}$  (2) and 0.5 and 10  $\mu\text{g g}^{-1}$  (3). <sup>b</sup> Analysis using LDTD-APCI-HRMS detection. <sup>c</sup> Results reported as total MCs equivalent.

**Table S2.** Cyanotoxins detection in CB dietary supplements ( $\mu\text{g g}^{-1}$ ) with relative standard deviation (RSD-%).

| No. | MCs tot <sub>a,b</sub> | ANA-a <sup>a</sup> | ANA-a           | DH-ANA-a <sup>c</sup> | E-ANA-a <sup>c</sup> | MC-RR          | MC-YR           | MC-LR            | MC-LA           | MC-LY           | MC-LW | MC-LF | MCs tot <sup>d</sup> | CYN | STX | BMAA            |
|-----|------------------------|--------------------|-----------------|-----------------------|----------------------|----------------|-----------------|------------------|-----------------|-----------------|-------|-------|----------------------|-----|-----|-----------------|
| 1   | ND                     | ND                 | ND              | ND                    | ND                   | ND             | ND              | ND               | ND              | ND              | ND    | ND    | ND                   | ND  | ND  | ND              |
| 2   | ND                     | ND                 | ND              | ND                    | ND                   | ND             | ND              | ND               | ND              | ND              | ND    | ND    | ND                   | ND  | ND  | ND              |
| 3   | ND                     | ND                 | ND              | ND                    | ND                   | ND             | ND              | ND               | ND              | ND              | ND    | ND    | ND                   | ND  | ND  | ND              |
| 4   | ND                     | ND                 | ND              | ND                    | ND                   | ND             | ND              | ND               | ND              | ND              | ND    | ND    | ND                   | ND  | ND  | ND              |
| 5   | ND                     | ND                 | ND              | ND                    | <b>1.6 (12)</b>      | ND             | ND              | ND               | ND              | ND              | ND    | ND    | ND                   | ND  | ND  | ND              |
| 6   | ND                     | ND                 | ND              | ND                    | ND                   | ND             | ND              | ND               | ND              | ND              | ND    | ND    | ND                   | ND  | ND  | ND              |
| 7   | ND                     | ND                 | ND              | ND                    | ND                   | ND             | ND              | ND               | ND              | ND              | ND    | ND    | ND                   | ND  | ND  | ND              |
| 8   | <b>0.21(11)</b>        | ND                 | ND              | <b>0.34 (12)</b>      | ND                   | ND             | ND              | ND               | <b>0.25 (9)</b> | ND              | ND    | ND    | <b>0.25</b>          | ND  | ND  | ND              |
| 9   | ND                     | ND                 | ND              | ND                    | ND                   | ND             | ND              | ND               | ND              | ND              | ND    | ND    | ND                   | ND  | ND  | ND              |
| 10  | ND                     | ND                 | ND              | ND                    | ND                   | ND             | ND              | ND               | ND              | ND              | ND    | ND    | ND                   | ND  | ND  | ND              |
| 11  | <b>0.84 (12)</b>       | ND                 | ND              | ND                    | <b>2.7 (11)</b>      | ND             | <b>0.53 (7)</b> | <b>0.02 (5)</b>  | <b>0.08 (6)</b> | ND              | ND    | ND    | <b>0.63</b>          | ND  | ND  | ND              |
| 12  | ND                     | ND                 | ND              | ND                    | ND                   | ND             | ND              | ND               | ND              | ND              | ND    | ND    | ND                   | ND  | ND  | ND              |
| 13  | <b>0.24 (8)</b>        | ND                 | ND              | ND                    | ND                   | ND             | ND              | <b>0.01 (11)</b> | ND              | ND              | ND    | ND    | <b>0.01</b>          | ND  | ND  | ND              |
| 14  | ND                     | ND                 | ND              | ND                    | ND                   | ND             | ND              | ND               | ND              | ND              | ND    | ND    | ND                   | ND  | ND  | ND              |
| 15  | <b>8.2 (7)</b>         | ND                 | <b>0.15 (7)</b> | <b>1.1 (13)</b>       | <b>0.92 (10)</b>     | <b>0.4 (9)</b> | ND              | <b>4.3 (7)</b>   | <b>1.1 (4)</b>  | <b>0.02 (8)</b> | ND    | ND    | <b>5.8</b>           | ND  | ND  | <b>0.04 (8)</b> |
| 16  | <b>1.5 (11)</b>        | ND                 | ND              | ND                    | <b>0.07 (9)</b>      | ND             | ND              | <b>1.2 (5)</b>   | <b>0.4 (6)</b>  | ND              | ND    | ND    | <b>1.6</b>           | ND  | ND  | ND              |
| 17  | <b>4.1 (9)</b>         | <b>0.44 (9)</b>    | <b>0.40 (9)</b> | <b>7.2 (12)</b>       | ND                   | ND             | <b>0.22 (6)</b> | <b>0.05 (9)</b>  | <b>3.2 (4)</b>  | ND              | ND    | ND    | <b>3.4</b>           | ND  | ND  | <b>0.55 (5)</b> |
| 18  | <b>0.8 (8)</b>         | ND                 | ND              | ND                    | ND                   | ND             | ND              | <b>0.52 (7)</b>  | ND              | ND              | ND    | ND    | <b>0.52</b>          | ND  | ND  | ND              |

ND – Not detected. <sup>a</sup> Analysis using LDTD-APCI-HRMS detection. <sup>b</sup> Total microcystins determined via MMPB reported as total MCs equivalent. <sup>c</sup> Concentrations are expressed as ANA-a equivalents.

**Table S3.** Parameters of HRMS detection of target cyanotoxins and internal standards.

| Compounds                       | RT (min) | Experimental precursor mass (m/z) | Quantification fragment (m/z) | Confirmation fragment (m/z) | NCE <sup>b</sup> (%) |
|---------------------------------|----------|-----------------------------------|-------------------------------|-----------------------------|----------------------|
| MMPB <sup>a</sup>               | NA       | 207.1019                          | 135.0808                      | 91.0547                     | 30                   |
| 4-PB <sup>a</sup>               | NA       | 163.0756                          | 91.0546                       | NA                          | 35                   |
| ANA-a <sup>a</sup>              | NA       | 166.1231                          | 149.0965                      | 131.0859                    | 30                   |
| PHE-D <sub>5</sub> <sup>a</sup> | NA       | 171.1181                          | 154.0917                      | NA                          | 30                   |
| ANA-a                           | 0.96     | 166.1231                          | 149.0965                      | 131.0859                    | 30                   |
| DH-ANA-a                        | 1.01     | 168.1383                          | 140.1069                      | 164.1068                    | 30                   |
| E-ANA-a                         | 1.04     | 182.1176                          | 133.1010                      | 93.0696                     | 30                   |
| MC-RR                           | 2.42     | 519.7907                          | 135.0804                      | 103.0542                    | 35                   |
| MC-YR                           | 2.61     | 1045.5353                         | 135.0804                      | 213.0870                    | 45                   |
| MC-LR                           | 2.68     | 995.5560                          | 135.0804                      | 213.0870                    | 40                   |
| MC-LA                           | 3.43     | 910.4920                          | 135.0804                      | 213.0870                    | 35                   |
| MC-LY                           | 3.77     | 1002.5188                         | 265.1587                      | 135.0804                    | 40                   |
| MC-LW                           | 4.24     | 1025.5347                         | 891.5199                      | 213.0870                    | 35                   |
| MC-LF                           | 4.49     | 986.5239                          | 213.0870                      | 375.2391                    | 35                   |
| NOD                             | 2.45     | 825.4505                          | 103.0542                      | NA                          | 45                   |
| CYN                             | 1.26     | 649.1744                          | 194.1291                      | 176.1184                    | 35                   |
| STX                             | 2.97     | 533.1925                          | 204.0877                      | 138.0665                    | 35                   |
| BMAA                            | 3.65     | 585.1836                          | 277.1007                      | 71.0131                     | 30                   |
| DAB-D <sub>3</sub>              | 3.50     | 588.2024                          | 279.1130                      | NA                          | 25                   |

NA – Not applicable. <sup>a</sup> Analysis using LDTD-APCI-HRMS detection. <sup>b</sup> Fragmentation energy for precursor ion in HCD cell.
